# Supplementary material
Source: PubMed Central journal article supplement (PMC10389775)
Supplement: PEDS_2022060351SupplementaryData.pdf [file PEDS_2022060351SupplementaryData.pdf]

## Supplemental Information

### Research Question:

What are the prevalence and characteristics of the long-term outcomes of SARS-CoV-2 infection in children and adolescents?

- Population: the general neonates, children and adolescents population

- Intervention (exposure): SARS-CoV-2 infection
- Comparison: neonates, children, and adolescents not infected with SARS-CoV
- Outcome: new, persistent, recurring symptoms after acute SARS-CoV-2 infection

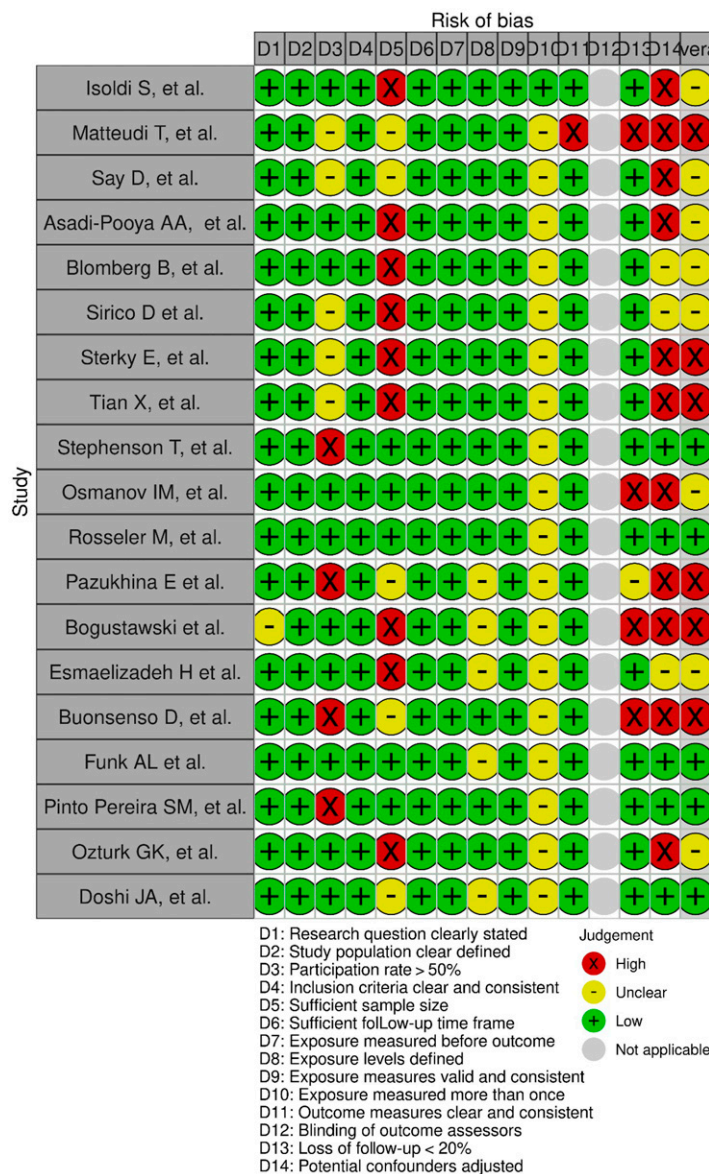

### SUPPLEMENTAL FIGURE 4

Risk of bias of included prospective cohort studies (N = 19).

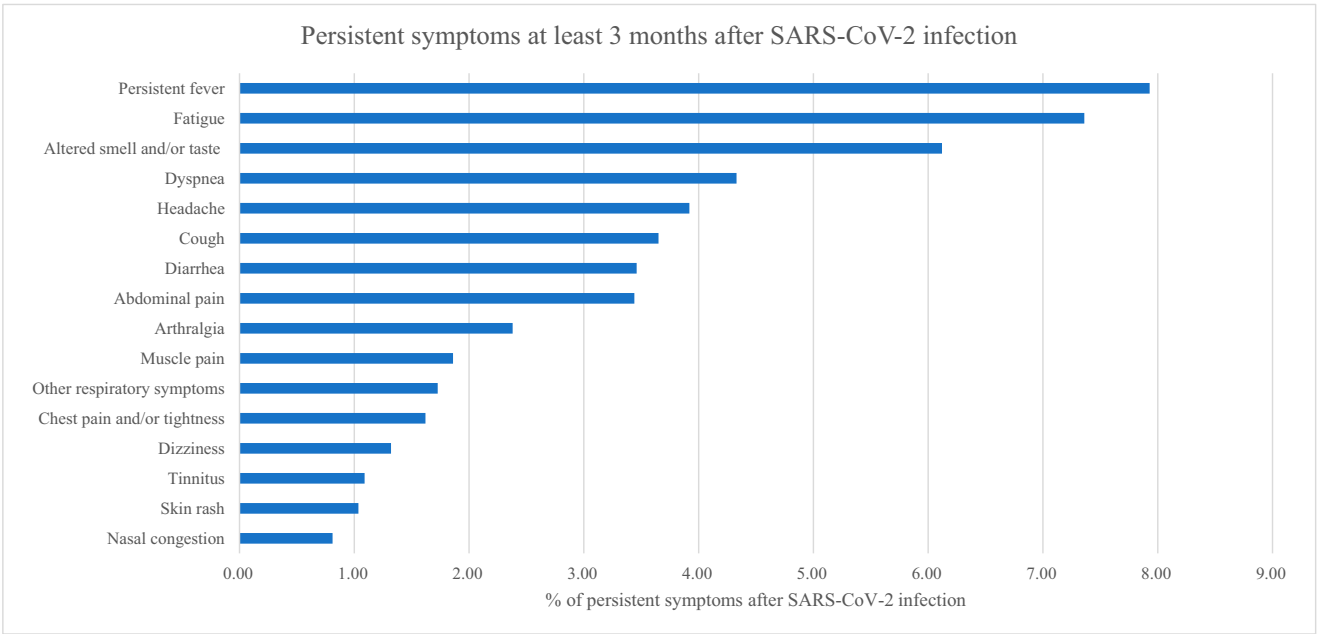

**SUPPLEMENTAL FIGURE 5**

Pooled proportion of persistent symptoms of COVID-19 (at least 3 months after acute SARS-CoV-2 infection) in neonates, children, and adolescents (0–19y)—Sensitivity analysis.

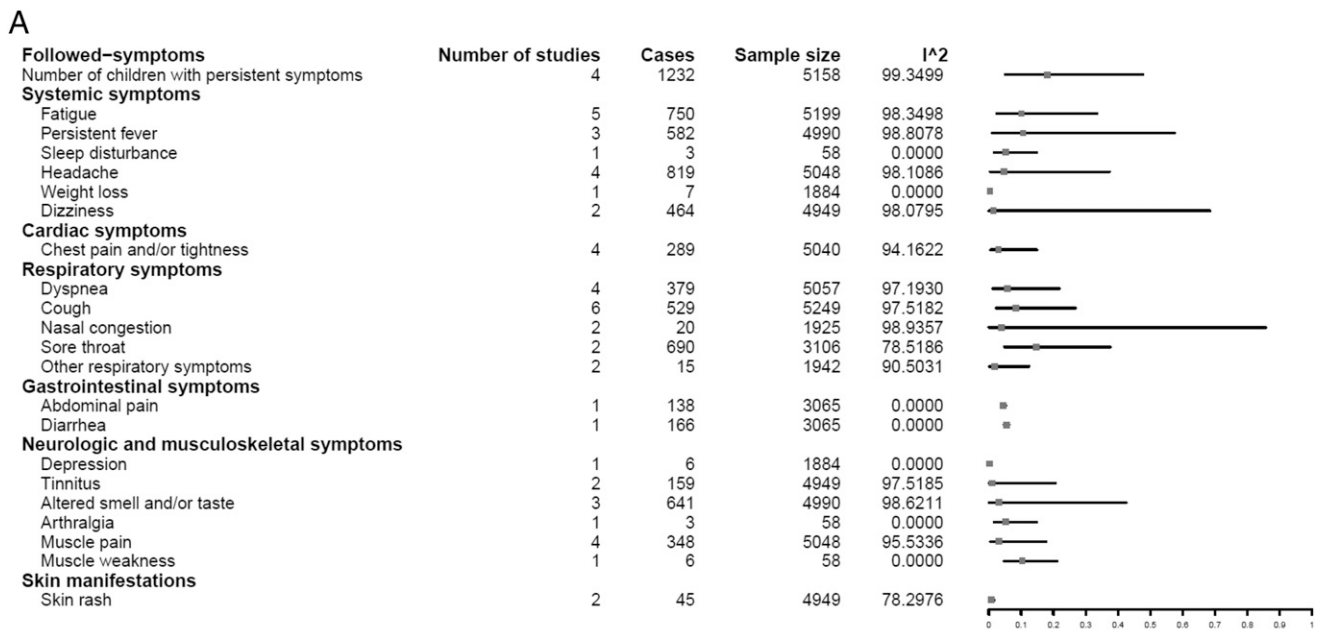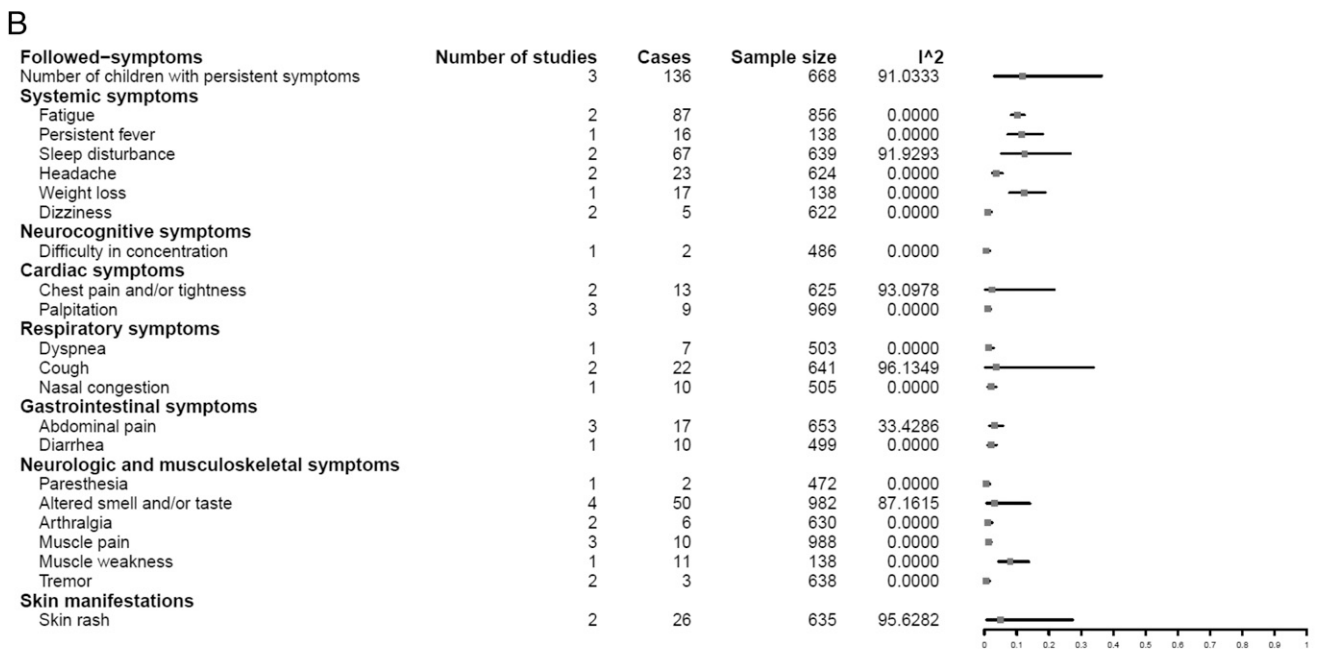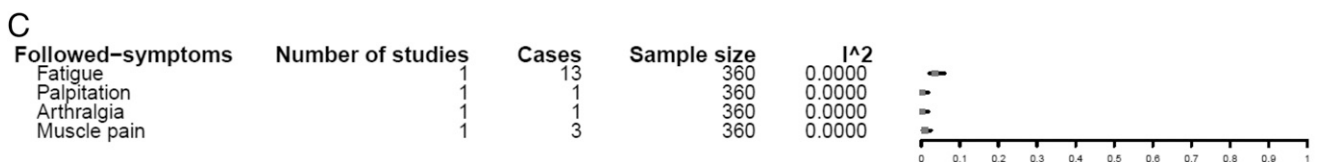

**SUPPLEMENTAL FIGURE 6**

Pooled proportion of persistent symptoms of COVID-19 (at least 3 months after acute SARS-CoV-2 infection) in neonates, children, and adolescents (0–19y)—subgroup analysis by follow-up duration. (A) Three to 6 months of follow-up. (B) Six to 12 months of follow-up. (C) >12 months of follow-up.

## A Up-middle income countries

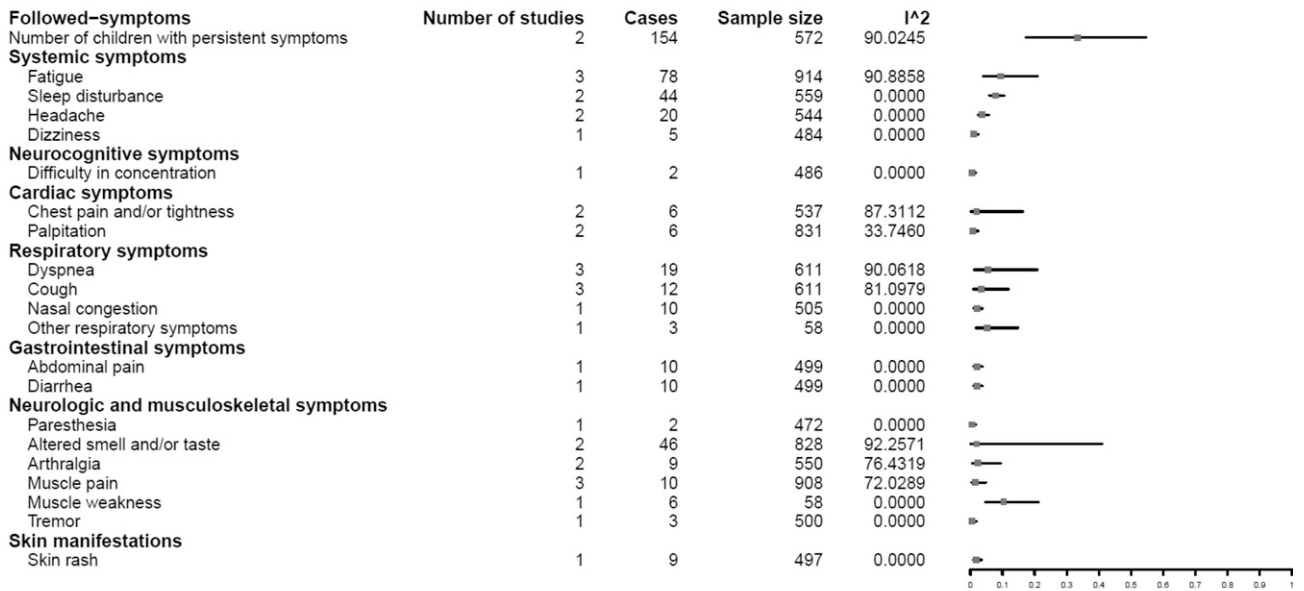

## B High-income countries

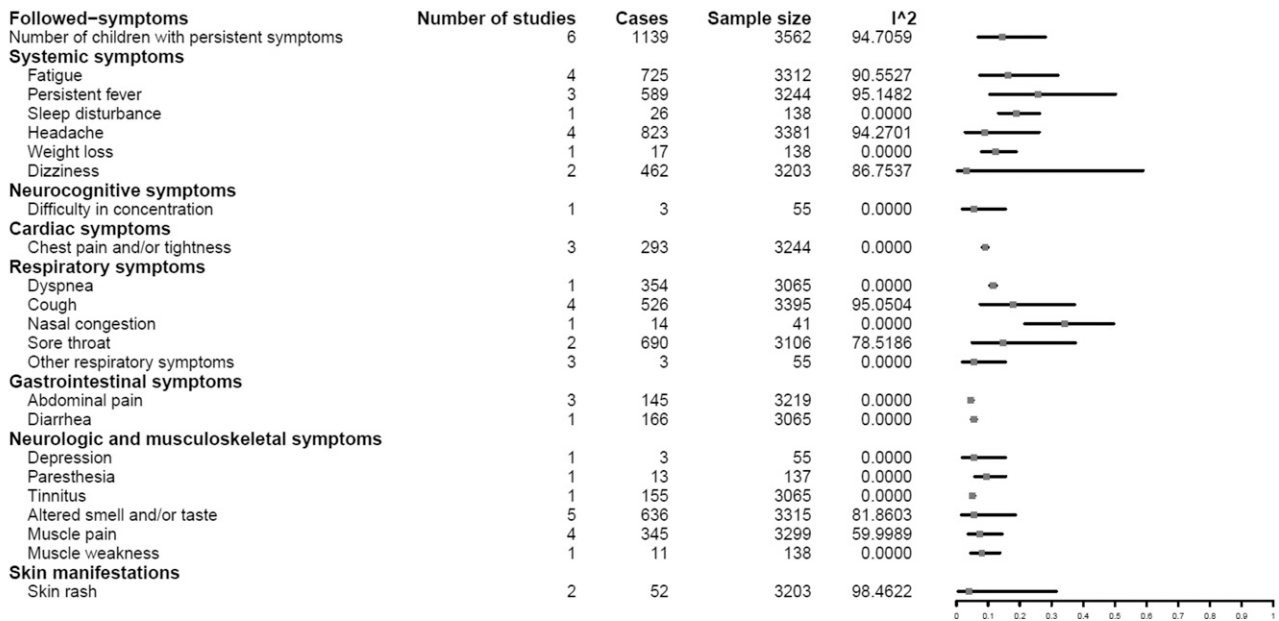

### SUPPLEMENTAL FIGURE 7

Pooled proportion of persistent symptoms of COVID-19 (at least 3 months after acute SARS-CoV-2 infection) in neonates, children, and adolescents (0–19y)—subgroup analysis by country's income level. (A) Upper-middle income countries. (B) High-income countries.

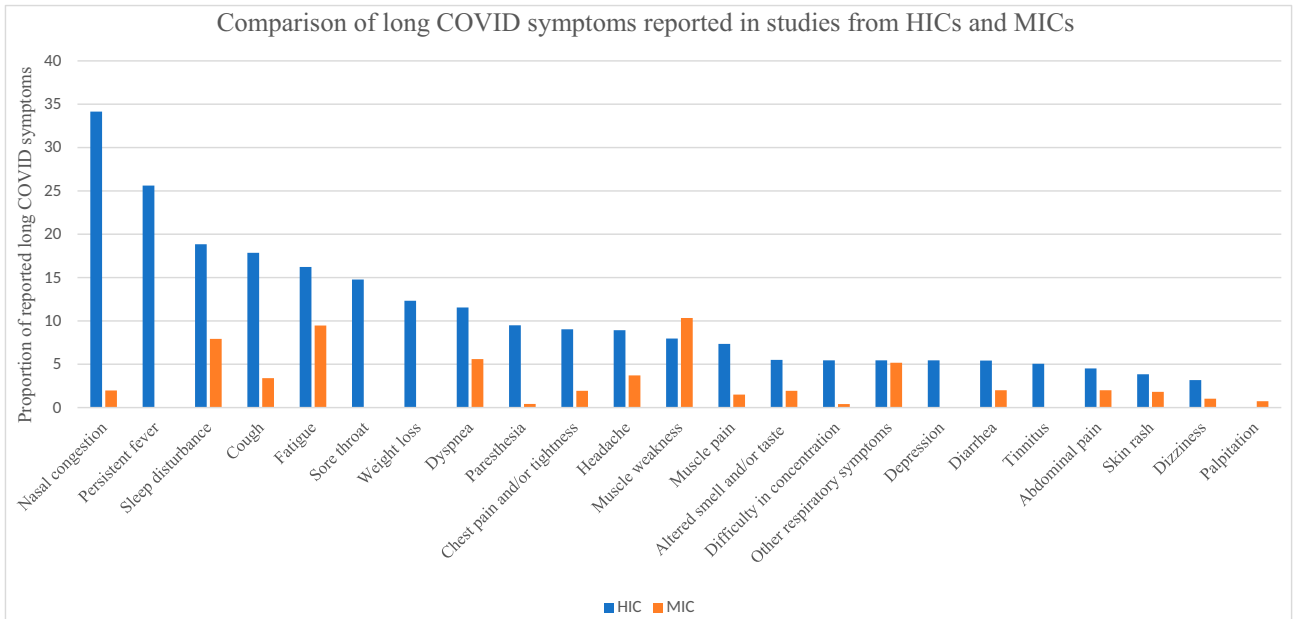

**SUPPLEMENTAL FIGURE 8**

Comparison of the prevalence of long COVID symptoms reported in prospective cohort studies from HICs and MICs.

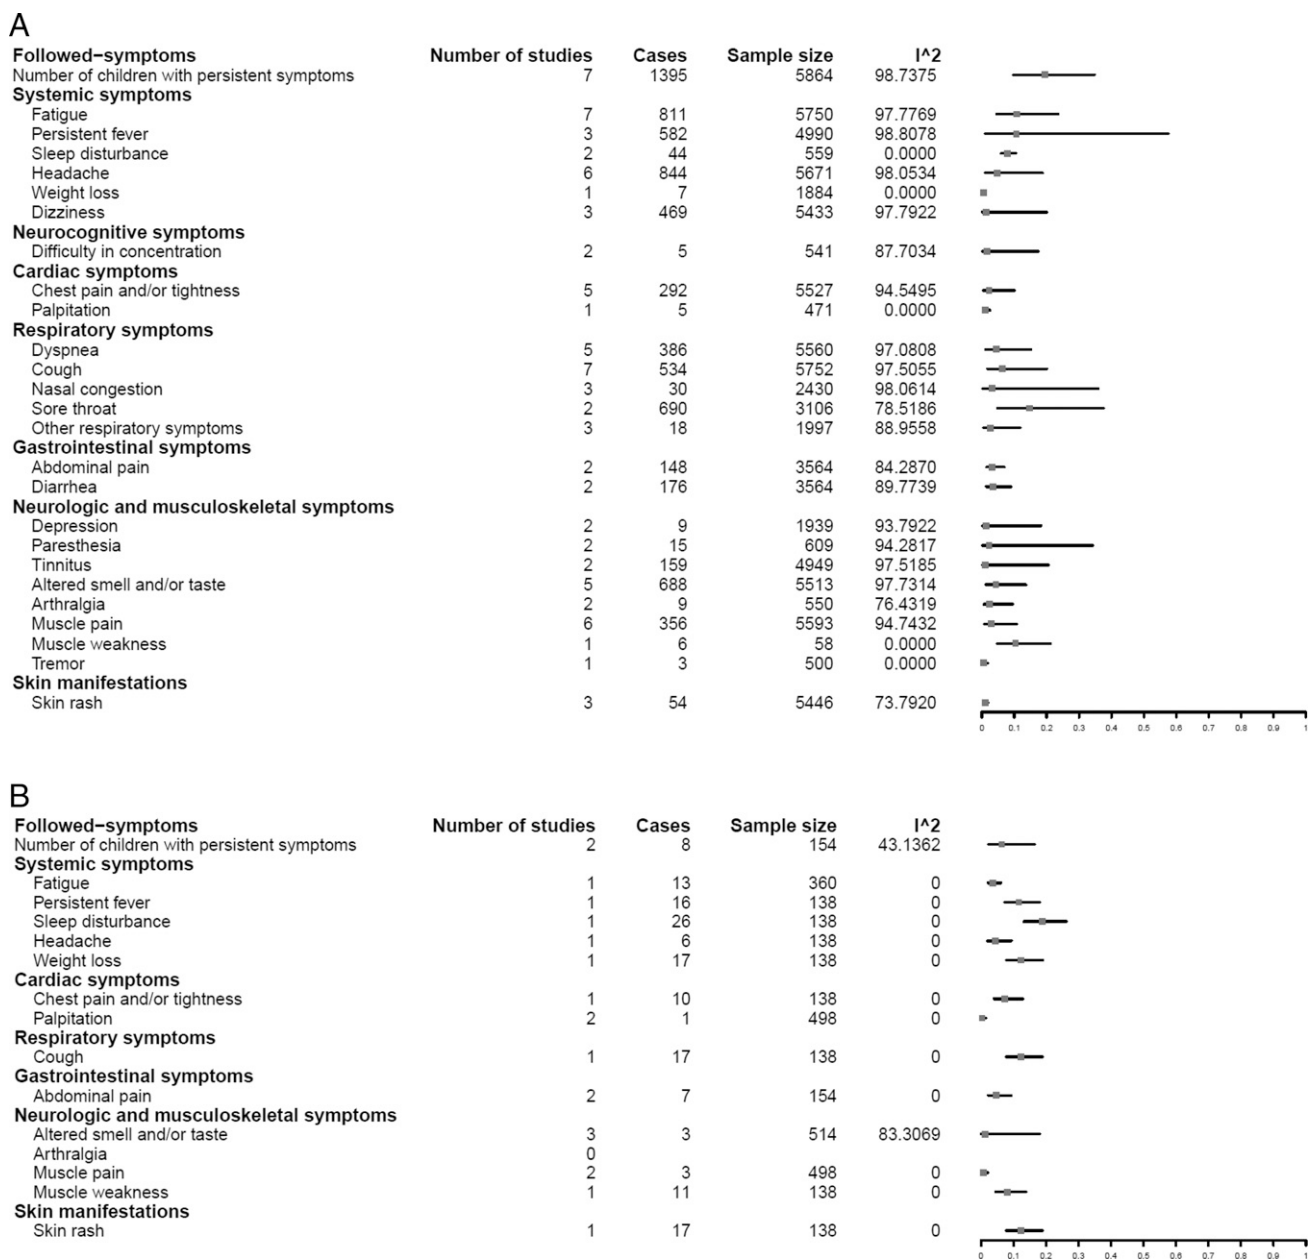

**SUPPLEMENTAL FIGURE 9**

Pooled proportion of persistent symptoms of COVID-19 (at least 3 months after acute SARS-CoV-2 infection) in neonates, children, and adolescents (0–19y)—subgroup analysis by study population. (A) Recruiting a pediatric population only. (B) Recruiting a mixed adult and pediatric population, with pediatric data reported separately.

| <b>SUPPLEMENTAL TABLE 4</b> Search Strategy for PubMed (Dec 31, 2022) |                                                                                                                                                                                                                                                                                                                                                                                                                                                                                                                                                                                                                                                                                                                                                                                                                                                                                                       |                |                 |
|-----------------------------------------------------------------------|-------------------------------------------------------------------------------------------------------------------------------------------------------------------------------------------------------------------------------------------------------------------------------------------------------------------------------------------------------------------------------------------------------------------------------------------------------------------------------------------------------------------------------------------------------------------------------------------------------------------------------------------------------------------------------------------------------------------------------------------------------------------------------------------------------------------------------------------------------------------------------------------------------|----------------|-----------------|
| <b>Search Number</b>                                                  | <b>Search Terms</b>                                                                                                                                                                                                                                                                                                                                                                                                                                                                                                                                                                                                                                                                                                                                                                                                                                                                                   | <b>Results</b> | <b>Comments</b> |
| Search set 1                                                          | COVID-19 Terms                                                                                                                                                                                                                                                                                                                                                                                                                                                                                                                                                                                                                                                                                                                                                                                                                                                                                        |                |                 |
| 1                                                                     | SARS-CoV-2[MeSH] OR COVID-19[MeSH] OR "SARS Coronavirus 2"[tiab] OR "Coronavirus 2, SARS"[tiab] OR 2019 Novel Coronavirus*[tiab] OR "Coronavirus, 2019 Novel"[tiab] OR "Novel Coronavirus, 2019" OR "Wuhan Seafood Market Pneumonia virus"[tiab] OR SARS-CoV-2 [tiab] OR "SARS CoV 2"[tiab] OR "2019-nCoV"[tiab] OR COVID-19 [tiab] OR "COVID 19"[tiab] OR "virus, COVID-19"[tiab] OR "Wuhan Coronavirus"[tiab] OR COVID19 [tiab] OR virus*, COVID19[tiab] OR "severe acute respiratory syndrome coronavirus 2"[tiab] OR "coronavirus disease 2019"[tiab] OR "disease 2019, coronavirus"[tiab] OR "coronavirus disease 19"[tiab] OR "coronavirus disease-19"[tiab] OR "infection, SARS-CoV-2"[tiab] OR "disease, 2019-nCoV" OR "virus infection, COVID-19"[tiab] OR "disease, COVID-19 virus"[tiab] OR "viral disease, COVID-19" [tiab] OR "infection, 2019-nCoV"[tiab] OR "pandemic, COVID-19"[tiab] | 322 794        |                 |
| Search set 2                                                          | Pediatric                                                                                                                                                                                                                                                                                                                                                                                                                                                                                                                                                                                                                                                                                                                                                                                                                                                                                             |                |                 |
| 2                                                                     | "infant, newborn" [Mesh] OR "infants, newborn" [tiab] OR newborn infant*[tiab] OR newborn* [tiab] OR neonate* [tiab]                                                                                                                                                                                                                                                                                                                                                                                                                                                                                                                                                                                                                                                                                                                                                                                  | 767 895        |                 |
| 3                                                                     | child [Mesh] OR children [tiab]                                                                                                                                                                                                                                                                                                                                                                                                                                                                                                                                                                                                                                                                                                                                                                                                                                                                       | 2 457 610      |                 |
| 4                                                                     | adolescent [Mesh] OR adolescents [tiab] OR adolescence [tiab] OR teen* [tiab] OR teenager* [tiab] OR youth*[tiab]                                                                                                                                                                                                                                                                                                                                                                                                                                                                                                                                                                                                                                                                                                                                                                                     | 2 291 862      |                 |
| 5                                                                     | 2 OR 3 OR 4                                                                                                                                                                                                                                                                                                                                                                                                                                                                                                                                                                                                                                                                                                                                                                                                                                                                                           | 4 169 272      |                 |
| Search set 3                                                          | Long-term symptoms and outcomes                                                                                                                                                                                                                                                                                                                                                                                                                                                                                                                                                                                                                                                                                                                                                                                                                                                                       |                |                 |
| 6                                                                     | long[tiab] OR "long-term"[tiab] OR "long term" [tiab] OR "persistent" [tiab] OR prolong* [tiab] OR "post-acute"[tiab] OR "post acute"[tiab] OR "chronic"[tiab]                                                                                                                                                                                                                                                                                                                                                                                                                                                                                                                                                                                                                                                                                                                                        | 3 523 405      |                 |
| 7                                                                     | Symptom* [tiab] OR infect*[tiab] OR complication*[tiab] OR syndrome*[tiab] OR illness* [tiab] OR sequelae*[tiab] OR outcome*[tiab] OR duration*[tiab] OR "follow up"[tiab] OR "follow-up"[tiab] OR followup [tiab] OR recover* [tiab]                                                                                                                                                                                                                                                                                                                                                                                                                                                                                                                                                                                                                                                                 | 8 113 765      |                 |
| 8                                                                     | 6 AND 7                                                                                                                                                                                                                                                                                                                                                                                                                                                                                                                                                                                                                                                                                                                                                                                                                                                                                               | 1 579 008      |                 |
| Search set 4                                                          | Long COVID                                                                                                                                                                                                                                                                                                                                                                                                                                                                                                                                                                                                                                                                                                                                                                                                                                                                                            |                |                 |
| 9                                                                     | "Post-acute COVID-19 syndrome"[tiab] OR "long-COVID"[tiab] OR "long COVID"[tiab] OR "long-haul COVID"[tiab] OR "post-acute COVID syndrome"[tiab] OR "post-acute COVID19 syndrome"[tiab] OR "persistent COVID-19"[tiab] OR "long hauler COVID"[tiab] OR "post-acute sequelae of SARS-CoV-2 infection"[tiab] OR "long haul COVID"[tiab] OR "chronic COVID syndrome"[tiab]                                                                                                                                                                                                                                                                                                                                                                                                                                                                                                                               | 2740           |                 |
| Final search                                                          |                                                                                                                                                                                                                                                                                                                                                                                                                                                                                                                                                                                                                                                                                                                                                                                                                                                                                                       |                |                 |
| 10                                                                    | 1 AND 8                                                                                                                                                                                                                                                                                                                                                                                                                                                                                                                                                                                                                                                                                                                                                                                                                                                                                               | 28 561         |                 |
| 11                                                                    | 9 OR 10                                                                                                                                                                                                                                                                                                                                                                                                                                                                                                                                                                                                                                                                                                                                                                                                                                                                                               | 28 970         |                 |
| 12                                                                    | 5 AND 11                                                                                                                                                                                                                                                                                                                                                                                                                                                                                                                                                                                                                                                                                                                                                                                                                                                                                              | 3328           |                 |

| SUPPLEMENTAL TABLE 5 Search Strategy for Embase (Dec 31, 2022) |                                                                                                                                                                                   |            |          |
|----------------------------------------------------------------|-----------------------------------------------------------------------------------------------------------------------------------------------------------------------------------|------------|----------|
| Search Number                                                  | Search Terms                                                                                                                                                                      | Results    | Comments |
| Search set 1                                                   | COVID-19 terms                                                                                                                                                                    |            |          |
| 1                                                              | exp coronavirus disease 2019/                                                                                                                                                     | 315 581    |          |
| 2                                                              | SARS-CoV-2.mp. or exp severe acute respiratory syndrome coronavirus 2/                                                                                                            | 158 855    |          |
| 3                                                              | (new or novel or 19 or 2019 or Wuhan or China or Chinese or Huanan) adj3 (coronavirus* or corona virus* or CoV or HCoV or betacoronavirus* or COVID).mp.                          | 385 202    |          |
| 4                                                              | 1 or 2 or 3                                                                                                                                                                       | 402 568    |          |
| Search set 2                                                   | Long term symptoms                                                                                                                                                                |            |          |
| 5                                                              | (long or prolong* or long-term or longterm or "long term" or chronic or persist* or post-acute or "post acute" or postacute or longlasting or "long lasting" or long-lasting).mp. | 5 721 697  |          |
| 6                                                              | (symptom* or infect* or complication* or syndrome* or illness* or outcome* or sequelae* or duration* or followup or "follow up" or follow-up or recover*).mp.                     | 14 483 510 |          |
| 7                                                              | 5 adj3 6                                                                                                                                                                          | 688 890    |          |
| Search set 3                                                   | Long COVID                                                                                                                                                                        |            |          |
| 8                                                              | (long covid or chronic covid or persistent covid or persisting covid or postacute covid or post-acute covid or post acute covid).mp.                                              | 4618       |          |
| Search set 4                                                   | Pediatric                                                                                                                                                                         |            |          |
| 9                                                              | exp newborn/                                                                                                                                                                      | 680 817    |          |
| 10                                                             | exp infant/                                                                                                                                                                       | 1 288 884  |          |
| 11                                                             | exp pediatrics/                                                                                                                                                                   | 137 503    |          |
| 12                                                             | exp child/ or exp school child/ or exp preschool child/                                                                                                                           | 3 430 438  |          |
| 13                                                             | exp adolescent/                                                                                                                                                                   | 1 865 054  |          |
| 14                                                             | exp young adult/                                                                                                                                                                  | 488 037    |          |
| 15                                                             | (infant* or newborn* or neonate* or child* or teen* or adolescen* or youth* or school age*).mp.                                                                                   | 5 171 270  |          |
| 16                                                             | 9 or 10 or 11 or 12 or 13 or 14 or 15                                                                                                                                             | 5 513 142  |          |
| Joint term                                                     |                                                                                                                                                                                   |            |          |
| 17                                                             | 4 and 7                                                                                                                                                                           | 10 889     |          |
| 18                                                             | 8 or 17                                                                                                                                                                           | 12 936     |          |
| 19                                                             | 16 and 18                                                                                                                                                                         | 1974       |          |
| 20                                                             | limit 19 to yr="2019 - 2022"                                                                                                                                                      | 1863       |          |



| <b>SUPPLEMENTAL TABLE 6</b> Search Strategy for Web of Science (Dec 31, 2022) |                                                                                                                                                                                                                                                                                                                                                                                                                                                                                                                                                                               |                |
|-------------------------------------------------------------------------------|-------------------------------------------------------------------------------------------------------------------------------------------------------------------------------------------------------------------------------------------------------------------------------------------------------------------------------------------------------------------------------------------------------------------------------------------------------------------------------------------------------------------------------------------------------------------------------|----------------|
| <b>Search Number</b>                                                          | <b>Search Terms</b>                                                                                                                                                                                                                                                                                                                                                                                                                                                                                                                                                           | <b>Results</b> |
| Search set 1                                                                  | COVID-19 terms                                                                                                                                                                                                                                                                                                                                                                                                                                                                                                                                                                |                |
| 1                                                                             | <b>Topic:</b> "SARS-CoV-2"OR "Coronavirus Disease 2019 Virus" OR "2019 Novel Coronavirus" OR "2019 Novel Coronaviruses" OR "Coronavirus, 2019 Novel" OR "Novel Coronavirus, 2019" OR "Wuhan Seafood Market Pneumonia Virus" OR "SARS-CoV-2 Virus" OR "SARS CoV 2 Virus" OR "SARS-CoV-2 Viruses" OR "Virus, SARS-CoV-2" OR "2019-nCoV" OR "COVID-19 Virus" OR "COVID 19 Virus" OR "COVID-19 Viruses" OR "Virus, COVID-19" OR "Wuhan Coronavirus" OR "Coronavirus, Wuhan" OR "SARS Coronavirus 2" OR "Coronavirus 2, SARS" OR "Severe Acute Respiratory Syndrome Coronavirus 2" | 283 133        |
| Search set 2                                                                  | Long term symptoms                                                                                                                                                                                                                                                                                                                                                                                                                                                                                                                                                            |                |
| 2                                                                             | <b>Topic:</b> long or prolong* or long-term or longterm or "long term" or chronic or persist* or post-acute or "post acute" or postacute or longlasting or "long lasting" or long-lasting                                                                                                                                                                                                                                                                                                                                                                                     | 12 299 417     |
| 3                                                                             | <b>Topic:</b> symptom* or infect* or complication* or syndrome* or illness* or outcome* or sequelae* or duration* or followup or "follow up" or follow-up or recover*                                                                                                                                                                                                                                                                                                                                                                                                         | 20 077 234     |
| 4                                                                             | 2 AND 3                                                                                                                                                                                                                                                                                                                                                                                                                                                                                                                                                                       | 3 674 933      |
| Search set 3                                                                  | Long COVID terms                                                                                                                                                                                                                                                                                                                                                                                                                                                                                                                                                              |                |
| 5                                                                             | "long covid" or "chronic covid" or "persistent covid" or "persisting covid" or "postacute covid" or "post-acute covid" or "post acute covid"                                                                                                                                                                                                                                                                                                                                                                                                                                  | 4113           |
| Search set 4                                                                  | Pediatric                                                                                                                                                                                                                                                                                                                                                                                                                                                                                                                                                                     |                |
| 6                                                                             | adolescen* OR child* OR infant* OR neonat* OR newborn* OR pediatric* OR pre-school* OR preschool* OR school* OR teen* OR toddler* OR youth*                                                                                                                                                                                                                                                                                                                                                                                                                                   | 8 192 044      |
| Joint term                                                                    |                                                                                                                                                                                                                                                                                                                                                                                                                                                                                                                                                                               |                |
| 7                                                                             | 1 and 4                                                                                                                                                                                                                                                                                                                                                                                                                                                                                                                                                                       | 38 516         |
| 8                                                                             | 5 or 7                                                                                                                                                                                                                                                                                                                                                                                                                                                                                                                                                                        | 40 037         |
| 9                                                                             | 6 and 8                                                                                                                                                                                                                                                                                                                                                                                                                                                                                                                                                                       | 6088           |
| 10                                                                            | Limit 19= "2019 to 2022"                                                                                                                                                                                                                                                                                                                                                                                                                                                                                                                                                      | 5943           |

## Search Strategy for medRxiv

for title “adolescen\*,child\*,infant\*, neonat\*,newborn\*, p?ediatric\*, pre-school\*, preschool\*, school\*,teen\*, toddler, youth, young adult” (match any words) and abstract or title “long, prolonged, long lasting, chronic, postacute, symptom\*, sequelae\*, follow up, infect\*, illness, complication, outcome”

(match any words) and full text or abstract or title “long covid, chronic covid, persistent covid, postacute covid, post-acute covid, post acute covid, long lasting covid” (match whole any) and posted between “01 Dec, 2019 and 31 Dec, 2022”

Results: 420

| Symptom                                           | Numbers of Study | Coefficient Estimate (95% CI) | P    |
|---------------------------------------------------|------------------|-------------------------------|------|
| Total number of children with persistent symptoms | 9                | -1.28 (-10.73 to 8.16)        | .79  |
| Fatigue                                           | 8                | -11.18 (-23.95 to 1.58)       | .09  |
| Dyspnea                                           | 5                | -7.02 (-22.46 to 8.41)        | .37  |
| persistent fever                                  | 4                | -21.07 (-46.09 to 3.96)       | .10  |
| Sleep disturbance                                 | 3                | -10.99 (-16.73 to -5.26)      | <.01 |
| Chest pain and or tightness                       | 6                | -13.43 (-27.66 to 0.79)       | .06  |
| Headache                                          | 7                | -18.25 (-29.03 to -7.46)      | <.01 |
| Altered smell and or taste                        | 8                | -6.92 (-25.38 to 11.53)       | .46  |
| Abdominal pain                                    | 4                | -7.25 (-13 to -1.51)          | .01  |
| Dizziness                                         | 4                | -22.43 (-44 to -0.85)         | .04  |
| Muscle pain                                       | 8                | -2.89 (-19.62 to 13.85)       | .74  |
| Cough                                             | 8                | -13.52 (-28.51 to 1.47)       | .08  |
| Other respiratory symptoms                        | 3                | 2.25 (-30.33 to 34.82)        | .89  |
| Nasal congestion                                  | 3                | -56.95 (-76.31 to -37.59)     | <.01 |
| Palpitation                                       | 3                | 20.29 (-37.42 to 78)          | .49  |
| Skin rash                                         | 4                | -10.57 (-25.42 to 4.28)       | .16  |

| Criteria                                                                                                                                                                                                                                   | Yes | No | Other (CD, NR, NA)* |
|--------------------------------------------------------------------------------------------------------------------------------------------------------------------------------------------------------------------------------------------|-----|----|---------------------|
| 1. Was the research question or objective in this paper clearly stated?                                                                                                                                                                    |     |    |                     |
| 2. Was the study population clearly specified and defined?                                                                                                                                                                                 |     |    |                     |
| 3. Was the participation rate of eligible persons at least 50%?                                                                                                                                                                            |     |    |                     |
| 4. Were all the subjects selected or recruited from the same or similar populations (including the same time period)? Were inclusion and exclusion criteria for being in the study prespecified and applied uniformly to all participants? |     |    |                     |
| 5. Was a sample size justification, power description, or variance and effect estimates provided?                                                                                                                                          |     |    |                     |
| 6. For the analyses in this paper, were the exposure(s) of interest measured prior to the outcome(s) being measured?                                                                                                                       |     |    |                     |
| 7. Was the timeframe sufficient so that one could reasonably expect to see an association between exposure and outcome if it existed?                                                                                                      |     |    |                     |
| 8. For exposures that can vary in amount or level, did the study examine different levels of the exposure as related to the outcome?                                                                                                       |     |    |                     |
| 9. Were the exposure measures (independent variables) clearly defined, valid, reliable, and implemented consistently across all study participants?                                                                                        |     |    |                     |
| 10. Was the exposure(s) assessed more than once over time?                                                                                                                                                                                 |     |    |                     |
| 11. Were the outcome measures (dependent variables) clearly defined, valid, reliable and implemented consistently across all study participants?                                                                                           |     |    |                     |
| 12. Were the outcome assessors blinded to the exposure status of participants?                                                                                                                                                             |     |    |                     |
| 13. Was loss to follow-up after baseline 20% or less?                                                                                                                                                                                      |     |    |                     |
| 14. Were key potential confounding variables measured and adjusted statistically for their impact on the relationship between exposure(s) and outcome(s)?                                                                                  |     |    |                     |

\*CD, cannot determine; NA, not applicable; NR, not reported.
